# Supplementary material for: Hydroxamate represents a versatile zinc binding group for the development of new carbonic anhydrase inhibitors
Source: Royal Society of Chemistry journal article supplement (doi:10.1039/c2cc34275h), 2012-01-01
Supplement: c2cc34275h.pdf [file c2cc34275h.pdf]

**Supplementary Information**

**HYDROXAMATE REPRESENTS A VERSATILE ZINC BINDING GROUP  
FOR THE DEVELOPMENT ON NEW CARBONIC ANHYDRASE  
INHIBITORS**

Anna Di Fiore, Alfonso Maresca, Claudiu T. Supuran and Giuseppina De Simone

## EXPERIMENTAL SECTION

### Chemistry and CA Inhibition

Phenyl hydroxamate **4** has been prepared by the routine procedure, by reacting benzoyl chloride with hydroxylamine in the presence of triethylamine.<sup>1,2</sup>

An Applied Photophysics stopped-flow instrument has been used for assaying the CA catalysed CO<sub>2</sub> hydration activity.<sup>3</sup> Phenol red (at a concentration of 0.2 mM) has been used as indicator, working at the absorbance maximum of 557 nm, with 20 mM Hepes (pH 7.5) as buffer, and 20 mM Na<sub>2</sub>SO<sub>4</sub> (for maintaining constant the ionic strength), following the initial rates of the CA-catalyzed CO<sub>2</sub> hydration reaction for a period of 10-100 s. The CO<sub>2</sub> concentrations ranged from 1.7 to 17 mM for the determination of the kinetic parameters and inhibition constants. For each inhibitor at least six traces of the initial 5-10% of the reaction have been used for determining the initial velocity. The uncatalyzed rates were determined in the same manner and subtracted from the total observed rates. Stock solutions of inhibitor (0.1 mM) were prepared in distilled-deionized water and dilutions up to 0.01 nM were done thereafter with the assay buffer. Inhibitor and enzyme solutions were preincubated together for 15 min at room temperature prior to assay, in order to allow for the formation of the E-I complex. The inhibition constants were obtained by non-linear least-squares methods using PRISM 3, as reported earlier,<sup>4,5</sup> and represent the mean from at least three different determinations. All CA isofoms were recombinant ones obtained in-house as reported earlier.<sup>6-8</sup>

Human purified MMPs (MMP-2, and MMP-8) were purchased from Calbiochem (Inalco, Milano, Italy). They were activated in the assay buffer by adding bovine trypsin (from Sigma, 50 μL, 0.6 mg/mL) to the proenzyme, followed by incubation at 37 °C for 10 min. The trypsin was then inactivated with aprotinin (50 μL, 1.2 mg/mL). Initial rates for the hydrolysis of the thioester substrate AcProLeuGly-S-LeuLeuGlyOEt, coupled to the reaction with 5,5'-dithiobis(2-

nitrobenzoic acid), were used for assessing the catalytic activity and inhibition of the two MMPs mentioned above, as reported earlier.<sup>1</sup> The change of absorbance ( $\epsilon_{\text{epsilon}} = 19\,800\text{ M}^{-1}\text{ cm}^{-1}$ ) at 405 nm was monitored continuously at room temperature, using a Cary 3 spectrophotometer interfaced with a PC. A typical 100- $\mu\text{L}$  reaction contained 50 mM MES, pH 6.0, 10 mM  $\text{CaCl}_2$ , 100  $\mu\text{M}$  substrate, 1 mM 5,5'-dithiobis(2-nitrobenzoic acid) and 5 nM MMP. For the  $K_I$  determinations, DMSO solutions of the inhibitor were included in the assay, resulting in a final concentration of 2% DMSO in the reaction mixture. In these conditions,  $K_I$  values varied from 5-10% in replicate experiments.  $K_I$ 's were then determined by using Easson-Stedman plots and a linear regression program, as reported earlier.<sup>1</sup>

### **Crystallization, X-ray data Collection and refinement**

Crystals of hCA II in complex with N-(Hydroxy)-benzamide **4** have been obtained by soaking techniques. In particular, enzyme crystals were grown at room temperature by the vapor diffusion hanging drop method. Equal volumes of protein (10 mg/ml in 0.1 M TRIS-HCl pH 8.5) and of a solution containing 2.4 M ammonium sulphate, 0.3 M sodium chloride, 0.1 M Tris-HCl, pH 8.6 and 5 mM 4-(hydroxymercurybenzoate) were mixed and equilibrated against a 500 microliters reservoir containing the same precipitant solution. A few hCA II native crystals were then transferred in a 2  $\mu\text{l}$  drop of freshly prepared precipitant solution containing also the inhibitor at the concentration of 20 mM. These crystals were kept in the soaking solution for about one hour, and then were transferred to the cryoprotectant (15% glycerol) and flash-frozen in  $\text{N}_2$ . A complete dataset was collected at 1.85 Å resolution by copper rotating anode generator developed by Rigaku and equipped with Rigaku Saturn CCD detector, at 100K. Data were processed using the HKL crystallographic data resolution package.<sup>9</sup> The crystal symmetry corresponds to the  $P2_1$  space group with unit cell dimensions of  $a=42.16\text{ \AA}$ ,  $b=41.50\text{ \AA}$ ,  $c=71.99\text{ \AA}$  and  $\beta=104.39^\circ$ . Data collection statistics are reported in Table S1.

The atomic coordinates of native hCA II (PDB accession code 1CA2)<sup>10</sup> less solvent molecules were used as starting model for refinement with CNS.<sup>11</sup> An initial round of rigid body refinement followed by simulated annealing and isotropic thermal factor (B-factor) refinement was performed.<sup>11</sup> The analysis of electron density maps in correspondence of the active site region after this single round of refinement showed the presence of an inhibitor molecule, which was easily built into the model. The geometry of metal-ligand interaction of hCA II-4 adduct was treated applying restraints in refinement. In particular, the information on bond lengths were derived from accurately determined structures of small-molecule crystals in the Cambridge Structural Database.<sup>12,13</sup> Many cycles of manual rebuilding and positional and temperature factor refinement were necessary to reduce the crystallographic Rfactor and Rfree values (in the 20.00–1.85 Å resolution range) to 0.163 and 0.203, respectively. Statistics for refinement are summarized in Table S1. Coordinates and structure factors have been deposited in the Brookhaven Protein Data Bank (Accession code 4FL7).

## References

1. A. Scozzafava, C. T. Supuran. *J. Med. Chem.* 2000, **43**, 3677.
2. E. Nuti, E. Orlandini, S. Nencetti, A. Rossello, A. Innocenti, A. Scozzafava, C. T. Supuran. *Bioorg. Med. Chem.* 2007, **15**, 2298.
3. R.G. Khalifah. *J. Biol. Chem.* 1971, **246**, 2561.
4. A. Maresca, C. Temperini, H. Vu, N. B. Pham, S. A. Poulsen, A. Scozzafava, R. J. Quinn, C. T. Supuran. *J. Am. Chem. Soc.* 2009, **131**, 3057.
5. A. Maresca, C. Temperini, L. Pochet, B. Masereel, A. Scozzafava, C. T. Supuran. *J. Med. Chem.* 2010, **53**, 335.
6. F. Carta, C. Temperini, A. Innocenti, A. Scozzafava, K. Kaila, C. T. Supuran. *J. Med. Chem.* 2010, **53**, 5511.
7. A. Di Fiore, E. Truppo, C. T. Supuran, V. Alterio, N. Dathan, F. Booterabi, S. Parkkila, S. M. Monti, G. De Simone. *Bioorg. Med. Chem. Lett.* 2010, **20**, 5023.
8. M. Hilvo, L. Baranauskienė, A. M. Salzano, A. Scaloni, D. Matulis, A. Innocenti, A. Scozzafava, S. M. Monti, A. Di Fiore, G. De Simone, M. Lindfors, J. Janis, J. Valjakka, S. Pastorekova, J. Pastorek, M. S. Kulomaa, H. R. Nordlund, C. T. Supuran, S. Parkkila. *J. Biol. Chem.* 2008, **283**, 27799.
9. Otwinowski, Z.; Minor, W. *Methods Enzymol.* 1997, **276**, 307-326.
10. Eriksson, A.E., Jones, T.A., Liljas, A. *Proteins* 1988, **4**: 274-282.
11. Brunger, A. T.; Adams, P. D.; Clore, G. M.; De Lano, W. L.; Gros, P.; Grosse-Kunstleve, R. W.; Jiang, J. S.; Kuszewski, J.; Nilges, M.; Pannu, N. S.; Read, R. J.; Rice, L. M.; Simonson, T.; Warren, G. L. *Acta Crystallogr. Sect. D* 1998, **54**, 905–921.
12. F. H. Allan, O. Kennard. *Chem. Des. Autom. News.* 1993, **8**, 1.
13. F. H. Allan, O. Kennard. *Chem. Des. Autom. News.* 1993, **8**, 31.

**Table S1** Crystal parameters, data collection and refinement statistics

| <i>Cell parameter</i>              |                 |
|------------------------------------|-----------------|
| Space group                        | P2 <sub>1</sub> |
| a (Å)                              | 42.16           |
| b (Å)                              | 41.50           |
| c (Å)                              | 71.99           |
| β (°)                              | 104.39          |
| <i>Data collection statistics</i>  |                 |
| Resolution (Å)                     | 20.00-1.85      |
| Temperature (K)                    | 100             |
| Total reflections                  | 60270           |
| Unique reflections                 | 19721           |
| Completeness (%)                   | 94.7 (78.4)     |
| R-merge *                          | 0.046 (0.067)   |
| Mean I/sigma(I)                    | 19.70 (12.05)   |
| <i>Refinement statistics</i>       |                 |
| Resolution (Å)                     | 20.00-1.85      |
| R-factor ** (%)                    | 16.3            |
| R-free ** (%)                      | 20.3            |
| rmsd from ideal geometry:          |                 |
| Bond lengths (Å)                   | 0.009           |
| Bond angles (°)                    | 1.5             |
| Number of protein atoms            | 2069            |
| Number of inhibitor atoms          | 10              |
| Number of water molecules          | 301             |
| Average B factor (Å <sup>2</sup> ) | 12.6            |

\*  $R_{\text{merge}} = \frac{\sum_{\text{hkl}} \sum_i |I_i(\text{hkl}) - \langle I(\text{hkl}) \rangle|}{\sum_{\text{hkl}} \sum_i I_i(\text{hkl})}$ , where  $I_i(\text{hkl})$  is the intensity of an observation and  $\langle I(\text{hkl}) \rangle$  is the mean value for its unique reflection; summations are over all reflections.

\*\*  $R_{\text{factor}} = \frac{\sum_h ||F_o(h)| - |F_c(h)||}{\sum_h |F_o(h)|}$ , where  $F_o$  and  $F_c$  are the observed and calculated structure-factor amplitudes, respectively.  $R_{\text{free}}$  was calculated with 5% of the data excluded from the refinement. Values in parenthesis are referred to the highest resolution shell (1.92-1.85 Å).
